# Supplementary material for: Protocol of a study to benchmark occupational health and safety in Japan: W2S-Ohpm study
Source: PubMed Central journal article supplement (PMC10655078; doi:10.3389/fpubh.2023.1191882), 2023-11-03
Supplement: Table_1.pdf [file Table_1.pdf]

# Supplementary Material

Table 1

|                                | W2S-Ohpm          |                   |                  | The national survey |                  |                  |
|--------------------------------|-------------------|-------------------|------------------|---------------------|------------------|------------------|
|                                | Total             | Sex               |                  | Total               | Sex              |                  |
|                                |                   | Men               | Women            |                     | Men              | Women            |
| (n, %)                         | (n, %)            | (n, %)            | (n (million), %) | (n (million), %)    | (n (million), %) |                  |
| Total                          | 27,693            | 15,201            | 12,492           | 6,687               | 3,678            | 3,011            |
| Self-employed                  | 2,596 (9.4%)      | 1,654 (10.9%)     | 942 (7.5%)       | 647 (9.7%)          | 402 (10.9%)      | 245 (8.1%)       |
| Company executive              | 1,595 (5.8%)      | 1,213 (8.0%)      | 382 (3.1%)       | 342 (5.1%)          | 259 (7%)         | 83 (2.8%)        |
| Full-time employee             | 15,240<br>(55.0%) | 10,064<br>(66.2%) | 5,176<br>(41.4%) | 3,597 (53.8%)       | 2,348 (63.8%)    | 1,250<br>(41.5%) |
| Part-time work                 | 5,217 (18.8%)     | 936 (6.2%)        | 4,281<br>(34.3%) | 1,474 (22%)         | 349 (9.5%)       | 1,126<br>(37.4%) |
| Dispatched employee            | 574 (2.1%)        | 158 (1.0%)        | 416 (3.3%)       | 149 (2.2%)          | 59 (1.6%)        | 90 (3%)          |
| Contract employees             | 1,747 (6.3%)      | 888 (5.8%)        | 859 (6.9%)       | 395 (5.9%)          | 221 (6%)         | 174 (5.8%)       |
| Freelance/Other                | 724 (2.6%)        | 288 (1.9%)        | 436 (3.5%)       | 83 (1.2%)           | 40 (1.1%)        | 43 (1.4%)        |
| Total                          | 27,693            | 15,201            | 12,492           | 6,514               | 3,574            | 2,940            |
| Agriculture and forestry       | 261 (0.9%)        | 172 (1.1%)        | 89 (0.7%)        | 192 (2.9%)          | 118 (3.3%)       | 74 (2.5%)        |
| Construction                   | 1,399 (5.1%)      | 980 (6.4%)        | 419 (3.4%)       | 479 (7.4%)          | 394 (11%)        | 85 (2.9%)        |
| Manufacturing                  | 4,432 (16.0%)     | 3,246 (21.4%)     | 1,186 (9.5%)     | 1044 (16%)          | 732 (20.5%)      | 312 (10.6%)      |
| Information and communications | 1,369 (4.9%)      | 982 (6.5%)        | 387 (3.1%)       | 272 (4.2%)          | 195 (5.5%)       | 77 (2.6%)        |
| Transport and postal services  | 1,221 (4.4%)      | 909 (6.0%)        | 312 (2.5%)       | 351 (5.4%)          | 274 (7.7%)       | 77 (2.6%)        |

|                                                             |               |               |                  |             |             |             |
|-------------------------------------------------------------|---------------|---------------|------------------|-------------|-------------|-------------|
| Wholesale and retail trade                                  | 2,887 (10.4%) | 1,292 (8.5%)  | 1,595<br>(12.8%) | 1044 (16%)  | 497 (13.9%) | 547 (18.6%) |
| Finance and insurance                                       | 1,197 (4.3%)  | 549 (3.6%)    | 648 (5.2%)       | 160 (2.5%)  | 73 (2%)     | 87 (3%)     |
| Real estate and goods rental and leasing                    | 702 (2.5%)    | 452 (3.0%)    | 250 (2.0%)       | 141 (2.2%)  | 83 (2.3%)   | 58 (2%)     |
| Scientific research, professional and technical services    | 788 (2.8%)    | 494 (3.2%)    | 294 (2.4%)       | 254 (3.9%)  | 158 (4.4%)  | 96 (3.3%)   |
| Accommodations, eating and drinking services                | 968 (3.5%)    | 326 (2.1%)    | 642 (5.1%)       | 381 (5.8%)  | 145 (4.1%)  | 236 (8%)    |
| Living-related and personal services and amusement services | 749 (2.7%)    | 294 (1.9%)    | 455 (3.6%)       | 225 (3.5%)  | 89 (2.5%)   | 136 (4.6%)  |
| Education and learning support                              | 1,718 (6.2%)  | 719 (4.7%)    | 999 (8.0%)       | 349 (5.4%)  | 145 (4.1%)  | 204 (6.9%)  |
| Medical, health care and welfare                            | 3,775 (13.6%) | 1,218 (8.0%)  | 2,557<br>(20.5%) | 908 (13.9%) | 227 (6.4%)  | 680 (23.1%) |
| Compound services/Services                                  | 3,102 (11.2%) | 1,623 (10.7%) | 1,479<br>(11.8%) | 463 (7.1%)  | 273 (7.6%)  | 190 (6.5%)  |
| Public sector                                               | 1,645 (5.9%)  | 1,165 (7.7%)  | 480 (3.8%)       | 251 (3.9%)  | 171 (4.8%)  | 81 (2.8%)   |
| Fisheries                                                   | 22 (0.1%)     | 13 (0.1%)     | 9 (0.1%)         |             |             |             |
| Mining and quarrying of stone and gravel                    | 29 (0.1%)     | 23 (0.2%)     | 6 (<0.1%)        |             |             |             |
| Electricity, gas, heat supply and water                     | 391 (1.4%)    | 295 (1.9%)    | 96 (0.8%)        |             |             |             |
| Unlabeled                                                   | 1,038 (3.7%)  | 449 (3.0%)    | 589 (4.7%)       |             |             |             |

---
